# Supplementary material
Source: publisher site journal article supplement (http://www.kjim.org/upload/media/kjim-2020-132-suppl1.pdf)
Supplement: Supplementary file 1 [file kjim-2020-132-suppl1.pdf]

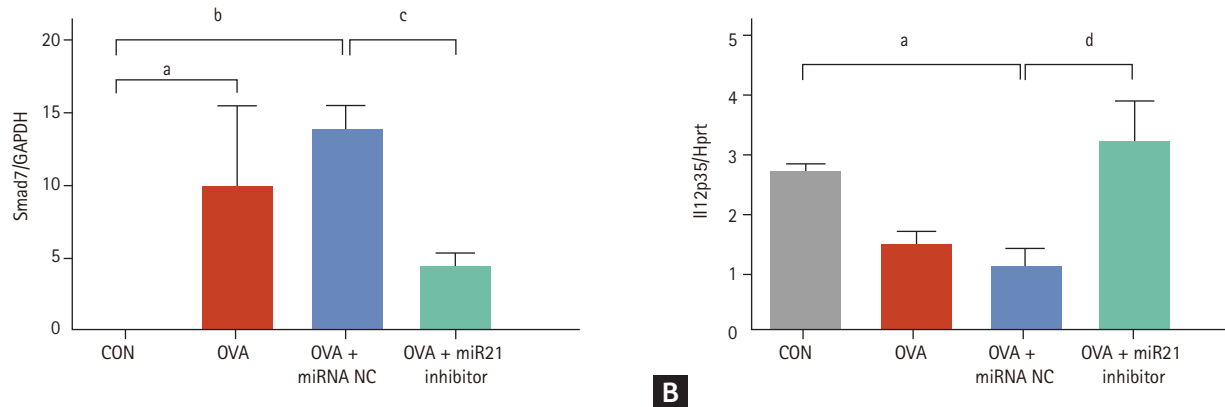

**Supplementary Figure 1.** MicroRNA (miR)-21 and interleukin (IL)-12p35 expression in ovalbumin (OVA)-induced chronic allergic asthma model. (A) miR-21 expression was estimated in the lung homogenates of different groups of mice. The relative expression levels were determined by quantitative reverse transcription polymerase chain reaction normalized to snoRNA202. (B) Il12p35 expression (normalized to hypoxanthine-guanine phosphoribosyltransferase [Hprt]). GAPDH, glyceraldehyde 3-phosphate dehydrogenase; CON, control; NC, negative control. <sup>a</sup>*p* < 0.05, <sup>b</sup>*p* < 0.001 compared with CON, <sup>c</sup>*p* < 0.01, <sup>d</sup>*p* < 0.05 compared with OVA + miRNA NC.
